# Supplementary material for: Subcritical Water as a Pre-Treatment of Mixed Microbial Biomass for the Extraction of Polyhydroxyalkanoates
Source: MDPI journal article supplement (doi:10.3390/bioengineering9070302), 2022-07-08
Supplement: s1 [file s1]

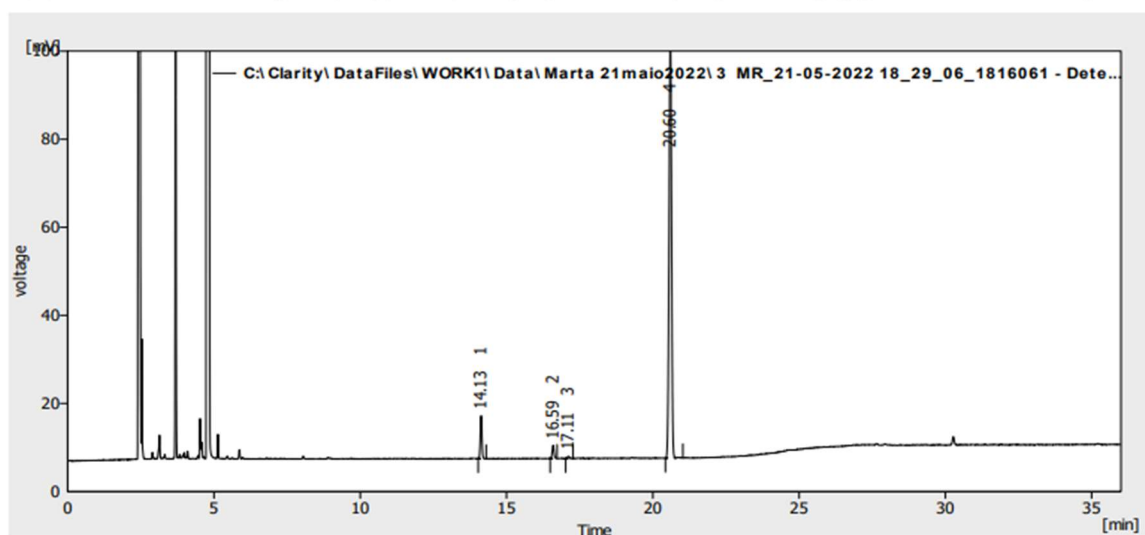

Result Table (Uncal - C:\Clarity\DataFiles\WORK1\Data\Marta 21maio2022\3 MR\_21-05-2022 18\_29\_06\_1816061 - Detector 1)

|       | Reten. Time<br>[min] | Area<br>[mV.s] | Height<br>[mV] | Area<br>[%] | Height<br>[%] | W05<br>[min] | Compound Name |
|-------|----------------------|----------------|----------------|-------------|---------------|--------------|---------------|
| 1     | 14.130               | 38.998         | 9.739          | 6.3         | 8.9           | 0.07         |               |
| 2     | 16.593               | 13.183         | 3.008          | 2.1         | 2.8           | 0.07         |               |
| 3     | 17.113               | 2.297          | 0.480          | 0.4         | 0.4           | 0.07         |               |
| 4     | 20.598               | 564.153        | 95.961         | 91.2        | 87.9          | 0.09         |               |
| Total |                      | 618.632        | 109.188        | 100.0       | 100.0         |              |               |

**Figure S1:** GC chromatogram of the P(HB-co-HV) sample obtained by Soxhlet extraction with chloroform, to illustrate the typical profile obtained.
